# Supplementary material
Source: MDPI journal article supplement (https://www.mdpi.com/2073-4344/10/3/267)
Supplement: s1 [file s1]

# Supplementary Materials: Ru Nanoparticles Embedded in Cubic Mesoporous Silica SBA-1 as Highly Efficient Catalysts for Hydrogen Generation from Ammonia Borane

Juti Rani Deka<sup>1</sup>, Diganta Saikia<sup>2</sup>, Kuo-Shu Hsia<sup>2</sup>, Hsien-Ming Kao<sup>2,\*</sup>, Yung-Chin Yang<sup>1,\*</sup> and Ching-Shiun Chen<sup>3,4,\*</sup>

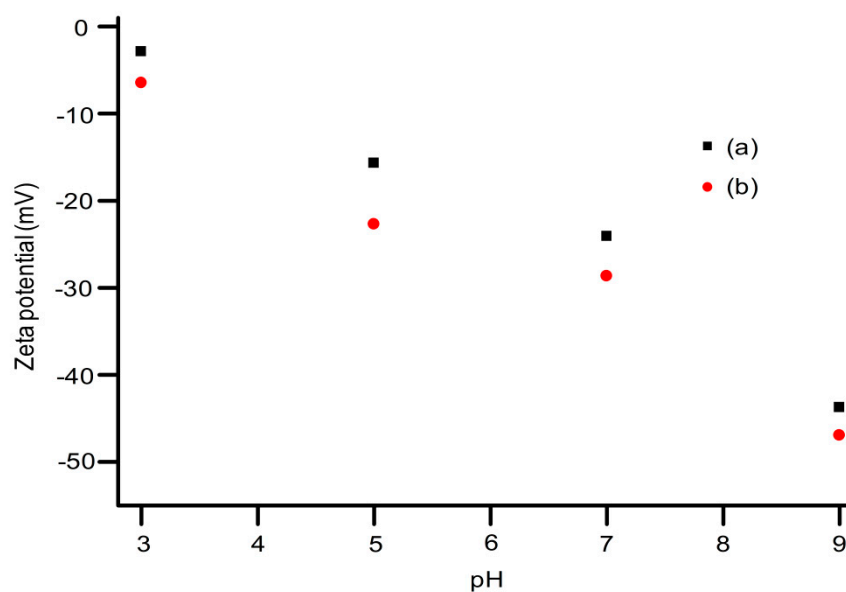

Figure S1. Zeta potentials of (a) S1B-C0 and (b) S1B-C10.

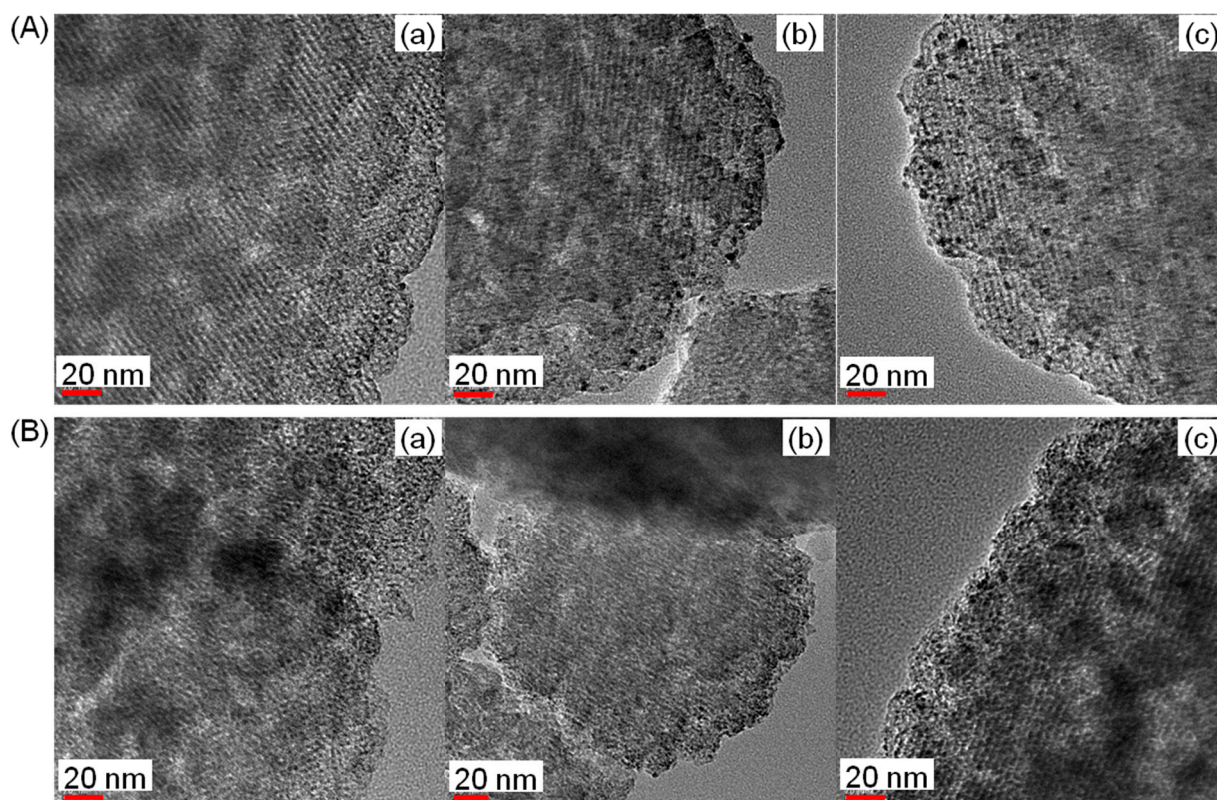

**Figure S2.** High magnification HRTEM images of (A) Ru(x)@S1B-C0 and (B) Ru(x)@S1B-C10, where x = (a) 0.5, (b) 1.0, and (c) 2.0 wt.%.

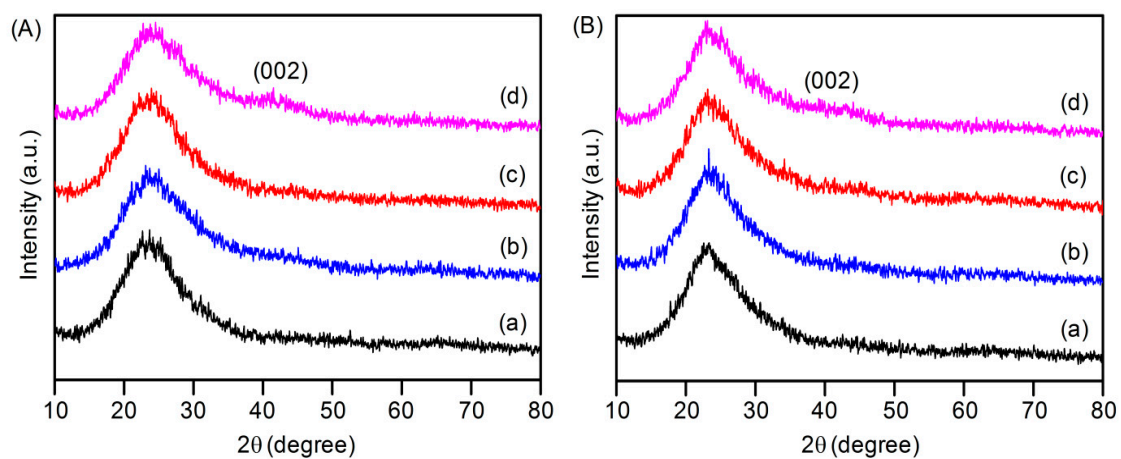

**Figure S3.** Wide angle XRD patterns (A) Ru(x)@S1B-C0 and (B) Ru(x)@S1B-C10, where x = (a) 0.5, (b) 1.0, (c) 2.0, and (d) 5.0 wt.%.

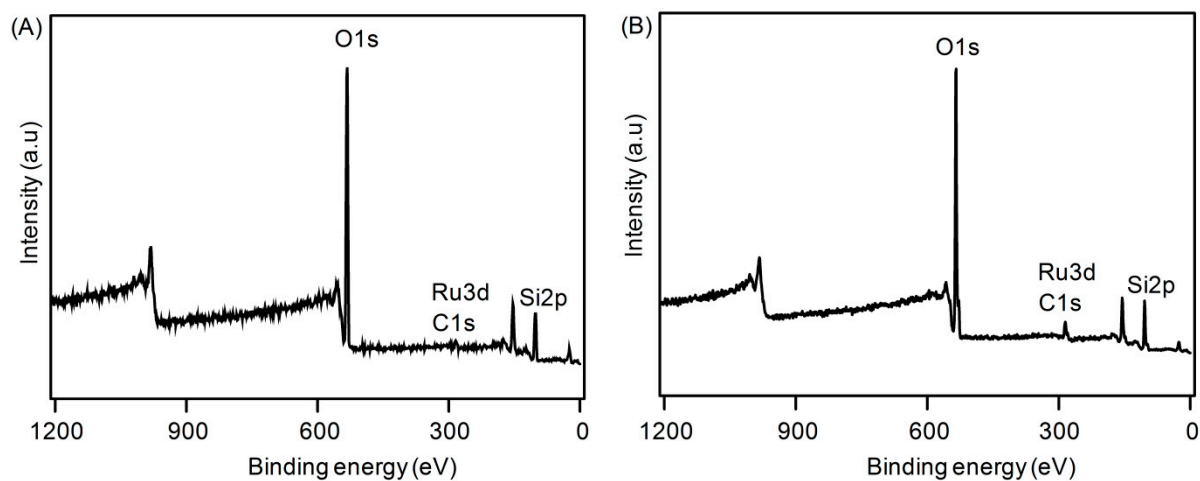

Figure S4. XPS Survey spectra of (A) Ru(1)@S1B-C0, and (B) Ru(1)@S1B-C10.

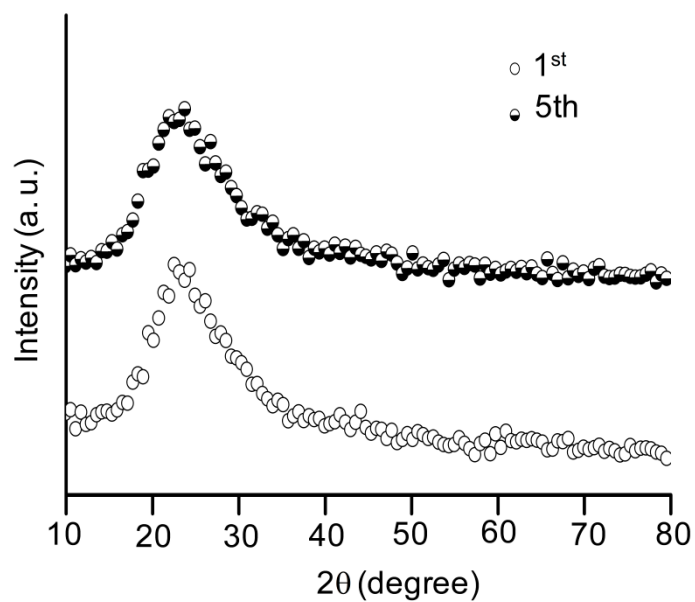

Figure S5. Wide angle XRD patterns of fresh and recycled Ru(1)@S1B-C10.
